# Supplementary material for: Porous calcium copper titanate electrodes for paracetamol degradation by electro-oxidation via CuO-induced peroxymonosulfate activation
Source: Royal Society of Chemistry journal article supplement (doi:10.1039/d3en00317e), 2023-01-01
Supplement: d3en00317e1.pdf [file d3en00317e1.pdf]

## Supporting information

### Porous calcium copper titanate electrodes for paracetamol degradation by electro-oxidation via CuO-induced peroxymonosulfate activation

Elissa Makhoul <sup>a,b</sup>, Fida Tanos <sup>a,c</sup>, Maged F. Bekheet <sup>d</sup>, Wiebke Riedel <sup>e</sup>, Eddy Petit <sup>a</sup>, Roman Viter <sup>f,g</sup>, Iryna Tepliakova <sup>f</sup>, Arunas Ramanavicius <sup>h</sup>, Antonio Razzouk <sup>c</sup>, Geoffroy Lesage <sup>a</sup>, Marc Cretin <sup>a</sup>, Madona Boulos <sup>b</sup>, David Cornu <sup>a</sup> and Mikhael Bechelany <sup>\*a, i</sup>

<sup>a</sup> Institut Européen des Membranes, IEM, UMR 5635, Univ Montpellier, ENSCM, Centre national de la recherche scientifique (CNRS), Place Eugène Bataillon, 34095 Montpellier

<sup>b</sup> Laboratoire de Chimie Physique des Matériaux (LCPM/PR2N), EDST, Université Libanaise, Faculté des Sciences II, Département de Chimie, Fanar, Lebanon

<sup>c</sup> Laboratoire d'Analyses Chimiques, Faculty of Sciences, LAC—Lebanese University, Jdeidet 90656, Lebanon

<sup>d</sup> Technische Universität Berlin, Faculty III Process Sciences, Institute of Materials Science and Technology, Chair of Advanced Ceramic Materials, Straße des 17. Juni 135, 10623 Berlin, Germany

<sup>e</sup> Freie Universität Berlin, Institut für Chemie und Biochemie, Arnimallee 22, 14195 Berlin, Germany

<sup>f</sup> Institut of Atomic Physics and Spectroscopy, University of Latvia, Rainis Blvd., LV-1586 Riga, Latvia

<sup>g</sup> Center for Collective Use of Scientific Equipment, Sumy State University, Sanatornaya Str. 31, 40018 Sumy, Ukraine

<sup>h</sup> Department of Physical Chemistry, Faculty of Chemistry and Geosciences, Institute of Chemistry, Vilnius University, Vilnius, Lithuania

<sup>i</sup> Gulf University for Science and Technology, GUST, Kuwait

Corresponding Author: [mikhael.bechelany@umontpellier.fr](mailto:mikhael.bechelany@umontpellier.fr)

#### S1. Characterization of the synthesized nanocomposites

The pellet surface morphology was analyzed using a Hitachi S4800 scanning electron microscope (SEM) and a three-dimensional (3D) optical microscope (VHX-7000, KEYENCE, Osaka, Japan). Elemental mapping and the crystalline phase were determined using a Zeiss EVO HD15 microscope with an Oxford X-MaxN EDX detector, and a PANalytical Xpert-PRO diffractometer with an Xcelerator detector using Ni-filtered Cu-radiation with a wavelength of 1.54 Å (scan step size = 0.0020889°/step, time per step = 200.660 sec, and 2θ = 20°–80°), respectively. The electrode phase composition was determined using Rietveld refinement and the FullProf software<sup>47</sup> with the profile function 7. LaB<sub>6</sub> structure refinement was used as standard to obtain the instrument resolution function. Raman spectra and mapping images were recorded using dispersive Raman spectroscopy (HORIBA LABRAM, λ = 659 nm). The laser power was fixed at 20 W with the following acquisition conditions: continuous mode of 10 s, snapshot time of 7 s, and 2.5 accumulations set to 30 times. The pellet surface

elemental composition and the pellet porosity were determined by X-ray photoelectron spectroscopy (XPS) using a monochromatic X-ray source (Al-K $\alpha$ , 1486.6 eV – Resolution FWHM 0.45 eV), and mercury porosimetry (Quantachrome Autoscan 500 porosimeter), respectively. Room-temperature continuous wave (cw) Electron Paramagnetic Resonance (EPR) measurements were carried out at X-band frequencies (9.78 GHz) using a Bruker B-ER420 spectrometer upgraded with a Bruker ECS 041XG microwave bridge and a lock-in amplifier (Bruker ER023M) that relies on a Bruker TE<sub>102</sub> resonator with modulation amplitude of 1 G, modulation frequency of 100 kHz, and attenuation of 30 dB for the microwave power. Samples were measured in 2.9 mm outer diameter quartz tubes (filling height of ~10 mm) that contained 0.08-0.09 g powdered sample. The optical properties were studied using photoluminescence and an optical fiber spectrometer (Ocean Optics usb2000) after excitement with a nitrogen Nd:YAG laser (266 nm, 10 mW, 1 kHz) in the 350–900 nm range.

## **S2. Toxicity test**

*V. fischeri* was reconstituted by adding 5 mL of reagent diluent at 5 °C. Then, the reagent was stabilized by transferring 200  $\mu$ L of the solution to the cuvettes at 15 °C for 15 min. *V. fischeri* bacteria were activated by adding 22% NaCl solution to the mixture to dilute the initial sample concentration to 0.27%. This dilution was selected to increase the bioluminescence measurement sensitivity and the detection of acute toxicity, even at extremely low concentrations of toxic compounds. Indeed, *V. fischeri* activity and consequently luminescence can be decreased by toxic compounds present in the solution.

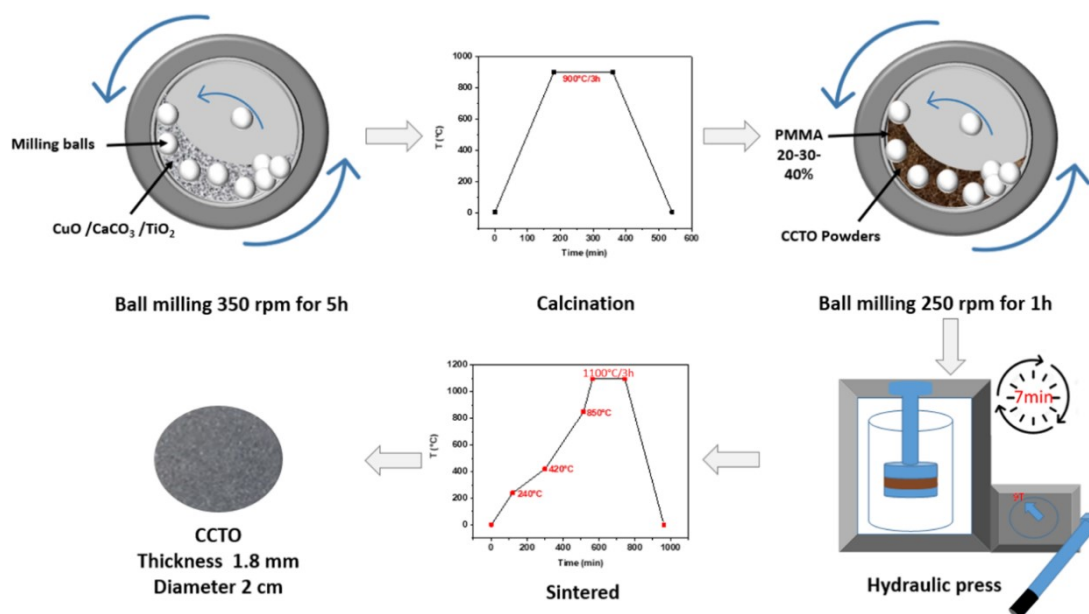

**Figure S1.** Schematic illustration the production of CCTO samples using different amounts of PMMA as pore-forming agent.

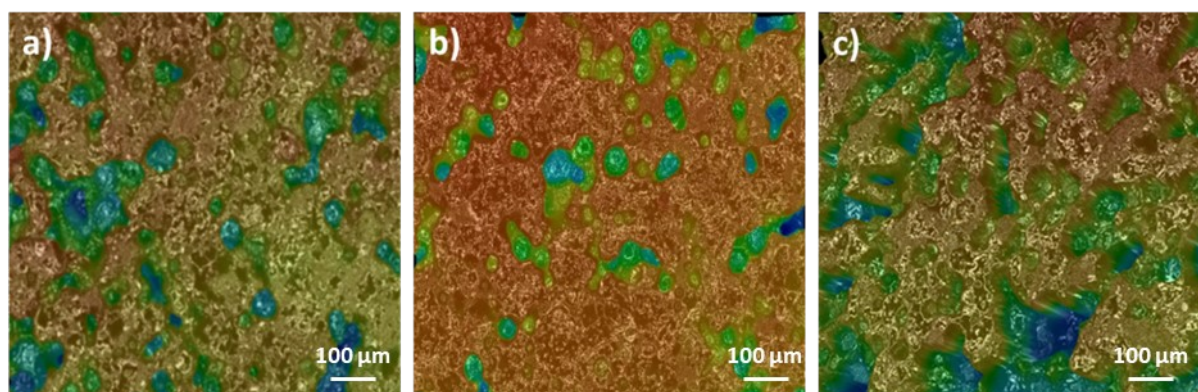

**Figure S2.** 3D optical microscopy images of a) CCTO-20, b) CCTO-30, and c) CCTO-40.

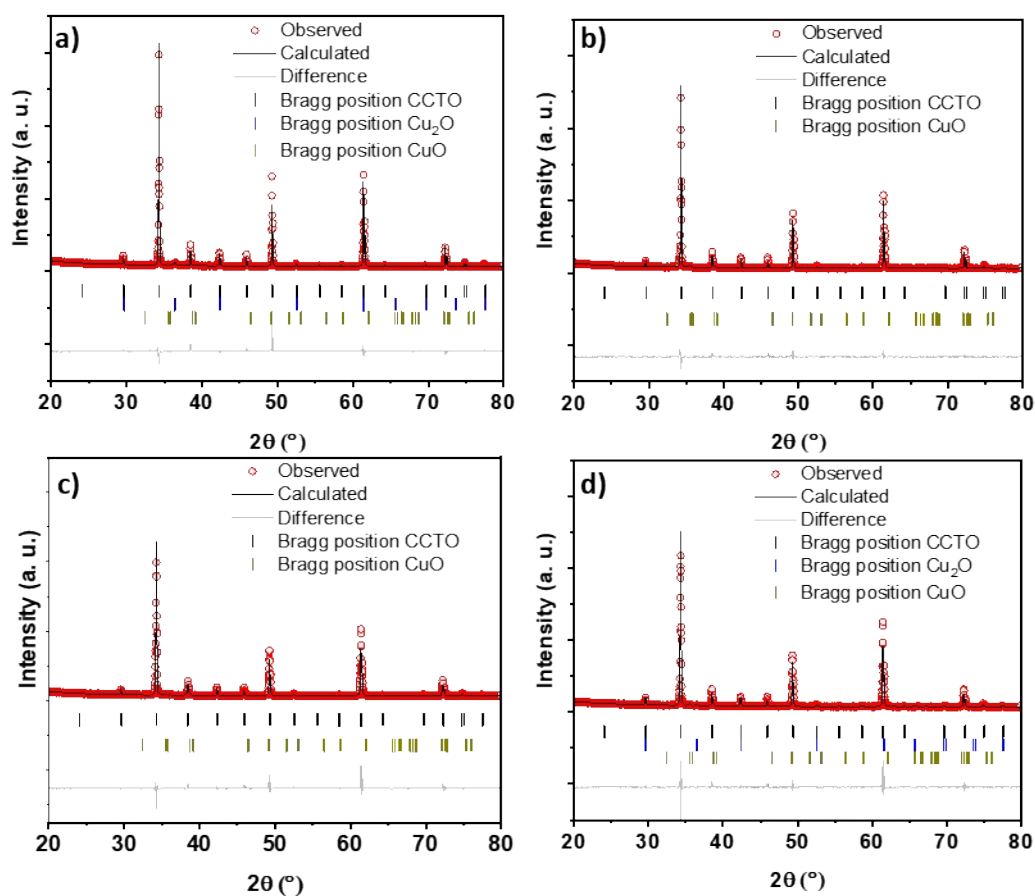

**Figure S3.** Structure refinement analysis based on the room-temperature XRD data for a) CCTO, b) CCTO-20, c) CCTO-30, and d) CCTO-40 powdered samples obtained by grinding the sintered pellets.

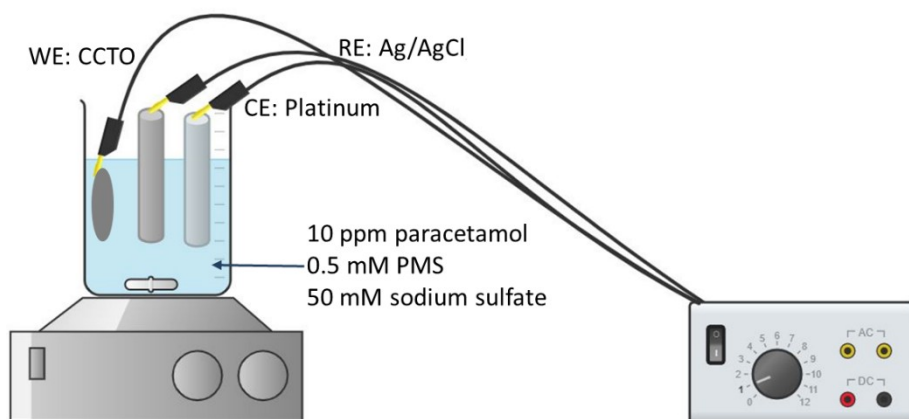

**Figure S4.** Electrocatalysis process. WE: working electrode; RE: reference electrode; CE: counter electrode.
